# Supplementary material
Source: Copernicus journal article supplement (doi:10.5194/acp-26-5839-2026)
Supplement: Supplementary file 1 [file acp-26-5839-2026-supplement.pdf]

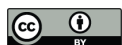

*Supplement of*

## **Unprecedented radioactive pollution in Spitsbergen's air – first data of the 21st century**

**Anna Cwanek et al.**

*Correspondence to:* Anna Cwanek ([anna.cwanek@ifj.edu.pl](mailto:anna.cwanek@ifj.edu.pl))

The copyright of individual parts of the supplement might differ from the article licence.

**Table S1: Meteorological parameters measured at the Stanislaw Siedlecki Polish Polar Station in Hornsund.**

| Variable                             | Location                          | Sensor                                                                                                                 | Height                   | Start operation | Unit              |
|--------------------------------------|-----------------------------------|------------------------------------------------------------------------------------------------------------------------|--------------------------|-----------------|-------------------|
| <b>Air temperature</b>               | 77°00'1.261" N<br>15°32'12.267" E | traditional thermometer in a Stevenson screen,<br>Vaisala HMP 45D (since January 2001),<br>HMP155 (since January 2018) | 2 m a.g.l.               | 1979            | °C                |
| <b>Relative humidity</b>             | 77°00'1.261" N<br>15°32'12.267" E | hygrometer,<br>HMP45D (since January 2001),<br>HMP155 (since January 2018)                                             | 2 m a.g.l.               | 1979            | %                 |
| <b>Sum of precipitation</b>          | 77°00'5.734" N<br>15°32'17.077" E | Hellmann rain gauge D-200                                                                                              | 1 m a.g.l.               | 1979            | mm                |
| <b>Atmospheric pressure</b>          | 77°00'1.261" N<br>15°32'12.267" E | Mercury barometer, PTB200A (since January 2001),<br>Baro-1QML-AV (since January 2018)                                  | reduced to the sea level | 1979            | hPa               |
| <b>Wind speed and wind direction</b> | 77°00'1.261" N<br>15°32'12.267" E | Fuess 90z wind meter,<br>Vaisala WAA151 (since January 2001),<br>Vaisala WMT702 (since January 2018)                   | 10 m a.g.l.              | 1983            | m s <sup>-1</sup> |
| <b>Sunshine duration</b>             | 77°00'5.935" N<br>15°32'14.3" E   | Campbell–Stokes heliograph                                                                                             | 2 m a.g.l.               | 1979            | h                 |
| <b>Cloudiness</b>                    | on location                       | visual observations                                                                                                    | -                        | 1983            | octa              |
| <b>Visibility</b>                    | on location                       | visual observations                                                                                                    | -                        | 1983            | marine scale      |

**Table S2: Results of quality assurance for blank samples.**

| Code                | $^{238}\text{Pu}$ (Bq) | $^{239+240}\text{Pu}$ (Bq) | $^{241}\text{Am}$ (Bq) |
|---------------------|------------------------|----------------------------|------------------------|
| <b>blank1</b>       | < 0.000063             | < 0.000068                 | < 0.000076             |
| <b>blank2</b>       | < 0.000043             | < 0.000040                 | < 0.00016              |
| <b>blank3</b>       | < 0.000039             | < 0.000034                 | < 0.00015              |
| <b>blank filter</b> | < 0.00021              | < 0.00012                  | < 0.00014              |

**Table S3: Results of quality assurance for reference materials (with 95% confidence intervals for error assessment).**

| Reference material | $^{238}\text{Pu}$ (Bq kg <sup>-1</sup> ) |                   | $^{239+240}\text{Pu}$ (Bq kg <sup>-1</sup> ) |                   | $^{241}\text{Am}$ (Bq kg <sup>-1</sup> ) |                   |
|--------------------|------------------------------------------|-------------------|----------------------------------------------|-------------------|------------------------------------------|-------------------|
|                    | <b>certified</b>                         | <b>calculated</b> | <b>certified</b>                             | <b>calculated</b> | <b>certified</b>                         | <b>calculated</b> |
| <b>IAEA-447</b>    | 0.150 ± 0.020                            | 0.148 ± 0.052     | 5.30 ± 0.40                                  | 5.27 ± 0.31       | 2.30 ± 0.40                              | 1.89 ± 0.13       |
| <b>IAEA-385</b>    | 0.392 ± 0.021                            | 0.440 ± 0.044     | 2.98 ± 0.26                                  | 3.50 ± 0.18       | 4.42 ± 0.23                              | 4.59 ± 0.36       |

**Table S4: Meteorological parameters in quarters used for correlation assessment (input dataset available at <https://doi.org/10.48733/no6.25.015>).**

| year | quarter | Air temperature (°C) | Sum of precipitation (mm) | Relative humidity (%) | Cloudiness (octa) | Sunshine duration (h) | Visibility (marine scale) | Atmospheric pressure (hPa) | N (m s <sup>-1</sup> ) | NE (m s <sup>-1</sup> ) | E (m s <sup>-1</sup> ) | SE (m s <sup>-1</sup> ) | S (m s <sup>-1</sup> ) | SW (m s <sup>-1</sup> ) | W (m s <sup>-1</sup> ) | NW (m s <sup>-1</sup> ) |
|------|---------|----------------------|---------------------------|-----------------------|-------------------|-----------------------|---------------------------|----------------------------|------------------------|-------------------------|------------------------|-------------------------|------------------------|-------------------------|------------------------|-------------------------|
| 2007 | 1       | -6.78                | 87.50                     | 75.79                 | 5.31              | 71.10                 | 6.99                      | 1001.03                    | 0.00                   | 1.04                    | 3.81                   | 0.58                    | 0.47                   | 0.33                    | 0.06                   | 0.05                    |
| 2007 | 2       | -2.70                | 48.30                     | 78.23                 | 6.22              | 543.70                | 7.34                      | 1009.81                    | 0.00                   | 0.42                    | 3.96                   | 0.75                    | 0.14                   | 0.33                    | 0.13                   | 0.13                    |
| 2007 | 3       | 3.38                 | 130.80                    | 85.50                 | 6.51              | 382.60                | 7.85                      | 1008.08                    | 0.00                   | 0.34                    | 2.58                   | 0.55                    | 0.37                   | 0.22                    | 0.29                   | 0.11                    |
| 2007 | 4       | -3.27                | 165.10                    | 78.62                 | 6.20              | 28.70                 | 7.23                      | 999.49                     | 0.00                   | 1.26                    | 2.49                   | 0.78                    | 0.38                   | 0.54                    | 0.61                   | 0.33                    |
| 2008 | 1       | -8.49                | 77.10                     | 77.18                 | 5.35              | 149.80                | 7.39                      | 1001.15                    | 0.00                   | 0.71                    | 4.88                   | 0.32                    | 0.39                   | 0.35                    | 0.33                   | 0.16                    |
| 2008 | 2       | -2.82                | 56.50                     | 78.17                 | 5.47              | 709.40                | 7.88                      | 1017.36                    | 0.00                   | 0.33                    | 2.89                   | 0.34                    | 0.32                   | 0.48                    | 0.14                   | 0.43                    |
| 2008 | 3       | 3.69                 | 226.20                    | 88.21                 | 6.62              | 369.10                | 6.93                      | 1010.78                    | 0.00                   | 0.21                    | 1.16                   | 0.64                    | 0.62                   | 0.57                    | 0.21                   | 0.26                    |
| 2008 | 4       | -5.26                | 80.10                     | 78.75                 | 5.47              | 19.80                 | 7.35                      | 1001.67                    | 0.00                   | 0.93                    | 3.29                   | 0.54                    | 0.31                   | 0.42                    | 0.46                   | 0.13                    |
| 2009 | 1       | -9.28                | 89.60                     | 78.65                 | 5.69              | 66.00                 | 7.03                      | 1005.44                    | 0.00                   | 0.49                    | 5.41                   | 0.53                    | 0.24                   | 0.11                    | 0.14                   | 0.19                    |
| 2009 | 2       | -3.27                | 71.90                     | 79.69                 | 5.52              | 630.10                | 7.79                      | 1013.26                    | 0.00                   | 0.02                    | 2.80                   | 0.54                    | 0.25                   | 0.39                    | 0.48                   | 0.34                    |
| 2009 | 3       | 3.85                 | 89.80                     | 83.43                 | 6.42              | 468.50                | 7.67                      | 1009.05                    | 0.00                   | 0.24                    | 3.09                   | 1.09                    | 0.19                   | 0.13                    | 0.23                   | 0.05                    |
| 2009 | 4       | -2.15                | 228.40                    | 82.94                 | 6.57              | 34.90                 | 7.14                      | 1007.94                    | 0.00                   | 1.38                    | 3.11                   | 0.43                    | 0.32                   | 0.21                    | 0.35                   | 0.19                    |
| 2010 | 1       | -8.80                | 119.70                    | 77.72                 | 5.30              | 186.40                | 7.00                      | 1011.58                    | 0.00                   | 1.17                    | 3.79                   | 0.46                    | 0.40                   | 0.48                    | 0.24                   | 0.19                    |
| 2010 | 2       | -1.77                | 65.80                     | 83.03                 | 6.51              | 488.90                | 7.57                      | 1014.18                    | 0.00                   | 0.64                    | 3.85                   | 0.68                    | 0.42                   | 0.16                    | 0.18                   | 0.00                    |
| 2010 | 3       | 3.32                 | 151.80                    | 87.20                 | 6.51              | 376.40                | 7.47                      | 1012.12                    | 0.00                   | 0.06                    | 2.12                   | 0.47                    | 0.56                   | 0.60                    | 0.17                   | 0.04                    |
| 2010 | 4       | -6.59                | 111.20                    | 76.90                 | 5.27              | 14.50                 | 7.64                      | 1009.20                    | 0.00                   | 1.27                    | 3.13                   | 0.53                    | 0.28                   | 0.35                    | 0.11                   | 0.00                    |
| 2011 | 1       | -10.62               | 139.10                    | 79.48                 | 5.30              | 115.40                | 7.65                      | 1002.26                    | 0.00                   | 0.47                    | 4.56                   | 0.58                    | 0.16                   | 0.51                    | 0.30                   | 0.00                    |
| 2011 | 2       | -0.72                | 74.70                     | 82.05                 | 5.71              | 621.10                | 7.83                      | 1010.62                    | 0.00                   | 0.50                    | 2.52                   | 0.57                    | 0.43                   | 0.38                    | 0.38                   | 0.06                    |
| 2011 | 3       | 4.06                 | 207.80                    | 88.60                 | 6.92              | 258.10                | 7.11                      | 1010.55                    | 0.00                   | 0.14                    | 3.44                   | 0.47                    | 0.41                   | 0.33                    | 0.33                   | 0.00                    |
| 2011 | 4       | -3.09                | 195.70                    | 79.07                 | 6.02              | 42.20                 | 7.07                      | 996.87                     | 0.05                   | 1.40                    | 3.00                   | 0.53                    | 0.28                   | 0.23                    | 0.29                   | 0.19                    |
| 2012 | 1       | -2.97                | 172.50                    | 81.35                 | 6.28              | 90.30                 | 6.92                      | 1002.71                    | 0.00                   | 0.61                    | 3.54                   | 0.72                    | 0.26                   | 0.40                    | 0.86                   | 0.00                    |
| 2012 | 2       | -2.53                | 39.90                     | 77.41                 | 5.75              | 579.40                | 7.59                      | 1011.17                    | 0.00                   | 1.17                    | 2.39                   | 0.42                    | 0.21                   | 0.40                    | 0.30                   | 0.11                    |
| 2012 | 3       | 4.08                 | 280.60                    | 83.65                 | 6.65              | 276.10                | 7.52                      | 1005.71                    | 0.00                   | 0.03                    | 2.82                   | 0.65                    | 0.36                   | 0.30                    | 0.31                   | 0.19                    |
| 2012 | 4       | -3.07                | 68.80                     | 75.64                 | 5.26              | 34.20                 | 7.58                      | 1010.13                    | 0.00                   | 1.47                    | 2.96                   | 0.34                    | 0.43                   | 0.23                    | 0.26                   | 0.00                    |
| 2013 | 1       | -9.49                | 61.30                     | 71.26                 | 4.43              | 121.00                | 7.68                      | 1013.27                    | 0.00                   | 1.20                    | 4.06                   | 0.40                    | 0.22                   | 0.27                    | 0.26                   | 0.13                    |
| 2013 | 2       | -2.44                | 76.80                     | 81.16                 | 5.81              | 474.90                | 7.56                      | 1011.46                    | 0.00                   | 0.37                    | 3.07                   | 0.50                    | 0.28                   | 0.60                    | 0.33                   | 0.14                    |
| 2013 | 3       | 5.44                 | 321.40                    | 86.22                 | 6.68              | 327.00                | 7.43                      | 1008.64                    | 0.00                   | 0.14                    | 2.96                   | 0.60                    | 0.18                   | 0.38                    | 0.41                   | 0.06                    |
| 2013 | 4       | -4.91                | 86.30                     | 73.33                 | 5.36              | 25.70                 | 7.38                      | 998.76                     | 0.00                   | 1.48                    | 3.10                   | 0.51                    | 0.20                   | 0.28                    | 0.43                   | 0.22                    |

|             |   |        |        |       |      |        |      |         |      |      |      |      |      |      |      |      |
|-------------|---|--------|--------|-------|------|--------|------|---------|------|------|------|------|------|------|------|------|
| <b>2014</b> | 1 | -3.64  | 93.60  | 78.71 | 5.97 | 127.20 | 7.39 | 1006.77 | 0.00 | 0.55 | 3.84 | 0.60 | 0.25 | 0.28 | 0.43 | 0.07 |
| <b>2014</b> | 2 | -1.96  | 56.50  | 76.39 | 6.12 | 566.60 | 7.84 | 1012.80 | 0.00 | 0.47 | 1.68 | 0.57 | 0.28 | 0.31 | 0.61 | 0.22 |
| <b>2014</b> | 3 | 4.33   | 151.50 | 82.19 | 6.43 | 437.00 | 7.48 | 1010.84 | 0.00 | 0.04 | 1.70 | 0.41 | 0.65 | 0.42 | 0.49 | 0.41 |
| <b>2014</b> | 4 | -4.10  | 111.90 | 78.36 | 5.85 | 13.70  | 6.89 | 1005.38 | 0.00 | 0.97 | 3.19 | 0.49 | 0.26 | 0.30 | 0.62 | 0.16 |
| <b>2015</b> | 1 | -7.34  | 107.20 | 78.79 | 5.66 | 78.40  | 6.49 | 998.53  | 0.00 | 0.59 | 5.09 | 0.30 | 0.39 | 0.27 | 0.49 | 0.18 |
| <b>2015</b> | 2 | -1.41  | 30.20  | 81.13 | 6.27 | 547.10 | 7.54 | 1008.03 | 0.00 | 0.50 | 2.93 | 0.61 | 0.26 | 0.30 | 0.10 | 0.00 |
| <b>2015</b> | 3 | 4.34   | 251.60 | 85.21 | 6.30 | 420.00 | 7.62 | 1013.86 | 0.00 | 0.05 | 2.54 | 0.70 | 0.55 | 0.13 | 0.35 | 0.12 |
| <b>2015</b> | 4 | -2.45  | 178.00 | 80.22 | 5.82 | 13.70  | 7.01 | 997.30  | 0.00 | 0.60 | 2.86 | 0.68 | 0.61 | 0.26 | 0.40 | 0.11 |
| <b>2016</b> | 1 | -3.91  | 104.20 | 78.17 | 5.65 | 132.80 | 6.92 | 1003.05 | 0.01 | 0.99 | 3.23 | 0.61 | 0.31 | 0.55 | 0.11 | 0.05 |
| <b>2016</b> | 2 | -0.03  | 50.60  | 80.95 | 6.20 | 432.10 | 7.67 | 1013.49 | 0.00 | 0.03 | 3.13 | 0.51 | 0.32 | 0.33 | 0.43 | 0.12 |
| <b>2016</b> | 3 | 5.07   | 241.80 | 85.92 | 6.74 | 354.30 | 7.29 | 1008.25 | 0.00 | 0.09 | 2.34 | 0.62 | 0.41 | 0.50 | 0.42 | 0.21 |
| <b>2016</b> | 4 | 0.02   | 410.10 | 81.34 | 6.44 | 1.40   | 6.44 | 1006.74 | 0.00 | 0.36 | 2.67 | 0.29 | 0.37 | 0.53 | 1.17 | 0.12 |
| <b>2017</b> | 1 | -7.61  | 142.00 | 75.14 | 5.52 | 97.40  | 7.13 | 1000.40 | 0.00 | 0.81 | 2.43 | 0.63 | 0.28 | 0.28 | 0.88 | 0.24 |
| <b>2017</b> | 2 | -2.62  | 49.10  | 78.17 | 5.54 | 657.80 | 8.21 | 1015.19 | 0.00 | 0.12 | 2.86 | 0.54 | 0.36 | 0.11 | 0.56 | 0.12 |
| <b>2017</b> | 3 | 5.13   | 223.80 | 86.60 | 6.72 | 327.30 | 7.33 | 1011.43 | 0.00 | 0.01 | 2.58 | 0.53 | 0.31 | 0.52 | 0.77 | 0.00 |
| <b>2017</b> | 4 | -1.55  | 142.30 | 74.46 | 5.96 | 19.60  | 7.06 | 1003.29 | 0.00 | 1.96 | 3.99 | 0.24 | 0.05 | 0.16 | 0.21 | 0.00 |
| <b>2018</b> | 1 | -6.36  | 91.70  | 72.98 | 5.05 | 171.60 | 7.39 | 1013.21 | 0.00 | 0.50 | 4.19 | 0.27 | 0.33 | 0.26 | 0.35 | 0.00 |
| <b>2018</b> | 2 | -1.02  | 163.80 | 79.63 | 6.15 | 497.20 | 7.78 | 1008.66 | 0.00 | 0.01 | 2.38 | 0.58 | 0.82 | 0.70 | 0.33 | 0.26 |
| <b>2018</b> | 3 | 4.05   | 286.90 | 86.62 | 6.84 | 279.00 | 7.20 | 1006.39 | 0.00 | 0.25 | 2.29 | 0.30 | 0.56 | 0.57 | 0.57 | 0.21 |
| <b>2018</b> | 4 | -2.26  | 227.80 | 77.40 | 6.17 | 42.00  | 7.41 | 1003.14 | 0.00 | 0.90 | 2.56 | 0.52 | 0.46 | 0.39 | 0.62 | 0.12 |
| <b>2019</b> | 1 | -8.96  | 32.40  | 70.18 | 5.30 | 90.50  | 7.49 | 1001.67 | 0.00 | 1.58 | 4.04 | 0.38 | 0.33 | 0.06 | 0.29 | 0.08 |
| <b>2019</b> | 2 | -0.42  | 59.20  | 76.42 | 6.13 | 598.30 | 7.87 | 1015.35 | 0.00 | 0.46 | 2.04 | 0.48 | 0.24 | 0.58 | 0.78 | 0.62 |
| <b>2019</b> | 3 | 4.22   | 116.10 | 84.99 | 6.34 | 354.30 | 7.67 | 1011.94 | 0.00 | 0.32 | 2.21 | 1.02 | 0.48 | 0.16 | 0.30 | 0.08 |
| <b>2019</b> | 4 | -5.84  | 56.80  | 75.65 | 4.98 | 28.70  | 7.54 | 1008.33 | 0.00 | 1.72 | 3.11 | 0.27 | 0.20 | 0.24 | 0.04 | 0.08 |
| <b>2020</b> | 1 | -12.81 | 40.10  | 71.55 | 4.27 | 132.30 | 7.51 | 994.36  | 0.00 | 0.91 | 3.72 | 0.59 | 0.34 | 0.43 | 0.21 | 0.21 |
| <b>2020</b> | 2 | -1.72  | 67.40  | 81.20 | 6.12 | 461.40 | 7.72 | 1009.72 | 0.00 | 0.12 | 2.61 | 0.74 | 0.70 | 0.35 | 0.78 | 0.39 |
| <b>2020</b> | 3 | 4.81   | 231.30 | 88.92 | 6.46 | 348.10 | 7.59 | 1004.88 | 0.00 | 0.10 | 3.40 | 0.63 | 0.39 | 0.34 | 0.17 | 0.00 |
| <b>2020</b> | 4 | -2.34  | 183.20 | 78.69 | 5.55 | 26.70  | 7.76 | 1007.07 | 0.00 | 1.16 | 3.50 | 0.56 | 0.25 | 0.20 | 0.58 | 0.11 |
| <b>2021</b> | 1 | -6.36  | 107.70 | 76.72 | 5.29 | 79.10  | 7.60 | 1010.40 | 0.00 | 0.88 | 3.64 | 0.90 | 0.20 | 0.35 | 0.38 | 0.20 |
| <b>2021</b> | 2 | -1.83  | 57.70  | 78.72 | 5.89 | 572.70 | 7.73 | 1009.64 | 0.00 | 0.70 | 2.16 | 0.46 | 0.22 | 0.68 | 0.74 | 0.23 |
| <b>2021</b> | 3 | 4.27   | 201.20 | 91.69 | 6.67 | 308.50 | 7.38 | 1008.19 | 0.00 | 0.00 | 2.52 | 0.64 | 0.53 | 0.44 | 0.44 | 0.00 |
| <b>2021</b> | 4 | -4.54  | 49.30  | 73.32 | 5.43 | 17.30  | 7.27 | 1008.67 | 0.00 | 1.59 | 3.81 | 0.25 | 0.24 | 0.24 | 0.20 | 0.13 |

**Table S5: Activity concentrations of radionuclides and suspended particulate matter (SPM) in quarters used for correlation assessment (input dataset available at <https://doi.org/10.48733/no6.25.015>).**

| year | quarter | SPM<br>( $\mu\text{g m}^{-3}$ ) | $^7\text{Be}$<br>( $\mu\text{Bq m}^{-3}$ ) | $^{137}\text{Cs}$<br>( $\mu\text{Bq m}^{-3}$ ) | $^{210}\text{Pb}$<br>( $\mu\text{Bq m}^{-3}$ ) | $^{239+240}\text{Pu}$<br>( $\text{nBq m}^{-3}$ ) | $^{238}\text{Pu}$<br>( $\text{nBq m}^{-3}$ ) | $^{241}\text{Am}$<br>( $\text{nBq m}^{-3}$ ) |
|------|---------|---------------------------------|--------------------------------------------|------------------------------------------------|------------------------------------------------|--------------------------------------------------|----------------------------------------------|----------------------------------------------|
| 2007 | 1       | 6.86                            | 2092.60                                    | 0.49                                           | 290.60                                         | 0.56                                             | 0.39                                         | 9.61                                         |
| 2007 | 2       | 4.75                            | 2254.98                                    | -                                              | 224.03                                         | 0.55                                             | 0.04                                         | 37.43                                        |
| 2007 | 3       | 3.75                            | 970.43                                     | 0.36                                           | 79.61                                          | 0.63                                             | 0.17                                         | 8.99                                         |
| 2007 | 4       | 12.40                           | 1397.65                                    | 0.38                                           | 275.79                                         | 0.85                                             | 0.20                                         | 13.67                                        |
| 2008 | 1       | 9.46                            | 2614.72                                    | 0.30                                           | 448.23                                         | 0.64                                             | 0.03                                         | 16.03                                        |
| 2008 | 2       | 4.30                            | 2885.33                                    | 0.25                                           | 358.31                                         | 0.84                                             | 0.11                                         | 11.96                                        |
| 2008 | 3       | 7.88                            | 1100.93                                    | 0.19                                           | 79.60                                          | 0.45                                             | 0.05                                         | 8.01                                         |
| 2008 | 4       | 16.07                           | 1655.87                                    | 0.27                                           | 186.11                                         | 2.27                                             | 0.43                                         | 11.37                                        |
| 2009 | 1       | 8.08                            | 3097.29                                    | 0.26                                           | 479.99                                         | 0.86                                             | 0.34                                         | 24.18                                        |
| 2009 | 2       | 3.14                            | 3389.85                                    | 0.21                                           | 399.13                                         | 0.54                                             | 0.29                                         | 73.72                                        |
| 2009 | 3       | 7.59                            | 1594.00                                    | 0.37                                           | 93.28                                          | 2.11                                             | 2.04                                         | 13.68                                        |
| 2009 | 4       | 11.13                           | 3155.70                                    | 0.37                                           | 254.12                                         | 0.62                                             | 0.81                                         | 21.02                                        |
| 2010 | 1       | 8.41                            | 2800.51                                    | 0.35                                           | 524.72                                         | 0.96                                             | 0.32                                         | 35.04                                        |
| 2010 | 2       | 4.32                            | 1772.40                                    | 0.44                                           | 144.70                                         | 1.18                                             | 0.49                                         | 19.57                                        |
| 2010 | 3       | 5.82                            | 1282.44                                    | 0.25                                           | 139.40                                         | 0.81                                             | 0.08                                         | 41.44                                        |
| 2010 | 4       | 11.21                           | 2518.43                                    | 0.29                                           | 432.70                                         | -                                                | 0.31                                         | -                                            |
| 2011 | 1       | 9.11                            | 3082.54                                    | 0.32                                           | 464.99                                         | -                                                | -                                            | -                                            |
| 2011 | 2       | 7.77                            | 3027.80                                    | 0.48                                           | 192.55                                         | -                                                | -                                            | -                                            |
| 2011 | 3       | 3.65                            | -                                          | 0.57                                           | 81.04                                          | -                                                | -                                            | -                                            |
| 2012 | 3       | 7.97                            | -                                          | 0.26                                           | 46.76                                          | -                                                | -                                            | -                                            |
| 2012 | 4       | 7.14                            | 922.21                                     | 0.23                                           | 131.42                                         | -                                                | -                                            | -                                            |
| 2013 | 1       | 5.40                            | 2613.09                                    | 0.30                                           | 516.92                                         | -                                                | -                                            | -                                            |
| 2013 | 2       | 6.52                            | 1154.99                                    | -                                              | 115.75                                         | -                                                | -                                            | -                                            |
| 2013 | 3       | 8.33                            | 1739.72                                    | 0.62                                           | 105.21                                         | -                                                | -                                            | -                                            |
| 2013 | 4       | 7.97                            | 1715.32                                    | -                                              | 282.60                                         | -                                                | -                                            | -                                            |
| 2014 | 1       | 7.36                            | 2042.56                                    | 0.78                                           | 240.69                                         | 0.23                                             | 0.08                                         | 17.00                                        |
| 2014 | 2       | 4.82                            | 1996.95                                    | 0.54                                           | 202.66                                         | 0.29                                             | 0.02                                         | 13.24                                        |

|             |   |       |         |      |        |      |      |       |
|-------------|---|-------|---------|------|--------|------|------|-------|
| <b>2014</b> | 3 | 8.41  | 1704.00 | -    | 102.39 | 0.72 | 0.09 | 11.27 |
| <b>2014</b> | 4 | 7.60  | 2165.69 | -    | 312.11 | 0.84 | 0.15 | 5.03  |
| <b>2015</b> | 1 | 15.32 | 2582.53 | -    | 472.00 | 0.70 | 0.03 | 9.36  |
| <b>2015</b> | 2 | 5.79  | 2229.30 | -    | 251.88 | 0.35 | 0.04 | 12.32 |
| <b>2015</b> | 3 | 3.80  | 1249.22 | -    | 117.68 | -    | -    | 38.12 |
| <b>2015</b> | 4 | 11.94 | 1477.26 | 0.44 | 205.09 | 1.51 | 0.03 | 81.54 |
| <b>2016</b> | 1 | 10.41 | 1990.43 | 0.55 | 310.61 | 0.86 | 0.06 | -     |
| <b>2016</b> | 2 | 7.07  | 1433.78 | -    | 105.59 | 0.66 | 0.10 | 90.96 |
| <b>2016</b> | 3 | 10.00 | 1449.87 | -    | 93.89  | 0.47 | 0.05 | 18.29 |
| <b>2016</b> | 4 | 15.87 | 1534.01 | -    | 232.81 | 0.84 | 0.14 | 7.33  |
| <b>2017</b> | 1 | 5.93  | 1962.82 | -    | 364.99 | 0.27 | 0.05 | 12.61 |
| <b>2017</b> | 2 | 4.33  | 2354.54 | -    | 282.05 | 0.47 | 0.13 | 18.67 |
| <b>2017</b> | 3 | 4.62  | 991.90  | -    | 100.92 | 0.38 | -    | 4.85  |
| <b>2017</b> | 4 | 7.77  | 1567.15 | -    | 161.76 | 1.13 | 1.82 | 10.42 |
| <b>2018</b> | 1 | 11.45 | 2205.41 | -    | 359.75 | 0.35 | 1.20 | 14.85 |
| <b>2018</b> | 2 | 10.20 | 1656.99 | -    | 179.04 | 0.32 | 0.69 | 34.10 |
| <b>2018</b> | 3 | 10.18 | 1051.68 | 0.17 | 81.86  | 1.65 | 0.29 | 86.74 |
| <b>2018</b> | 4 | 12.41 | 1247.86 | -    | 159.19 | 0.91 | -    | -     |
| <b>2019</b> | 1 | 5.91  | 2407.05 | -    | 494.42 | 0.77 | -    | -     |
| <b>2019</b> | 2 | 5.73  | 2023.55 | -    | 194.05 | 0.51 | 0.22 | 40.44 |
| <b>2019</b> | 3 | 4.90  | 1154.00 | -    | 100.46 | 0.78 | 0.05 | 25.53 |
| <b>2019</b> | 4 | 10.26 | 1900.83 | 0.55 | 255.57 | -    | 0.39 | 22.40 |
| <b>2020</b> | 1 | 10.74 | 2419.59 | 0.63 | 593.17 | -    | 0.75 | 15.07 |
| <b>2020</b> | 2 | 10.45 | 2789.05 | -    | 202.10 | 0.80 | 0.32 | 13.12 |
| <b>2020</b> | 3 | 4.98  | 1302.47 | 0.11 | 90.09  | 0.90 | -    | 10.45 |
| <b>2020</b> | 4 | 10.97 | 1550.83 | 0.07 | 162.02 | 1.43 | 0.21 | 18.03 |
| <b>2021</b> | 1 | 6.74  | 2549.31 | -    | 307.59 | 0.44 | 0.17 | 2.55  |
| <b>2021</b> | 2 | 6.51  | 2564.23 | -    | 161.97 | 0.43 | 0.09 | 8.54  |
| <b>2021</b> | 3 | 8.36  | -       | 0.20 | 66.92  | 0.34 | 0.13 | 4.48  |
| <b>2021</b> | 4 | 12.68 | 2507.91 | -    | 331.23 | -    | 0.35 | 11.47 |

**Table S6: Reference signatures (activity ratios) of selected past nuclear events.**

| Activity ratio                           | Global fallout <sup>1</sup><br>(+ SNAP 9A) | Chernobyl <sup>2</sup><br>(NPP) | Fukushima <sup>3</sup><br>(NPP) | Thule <sup>4</sup><br>(Weapon grade) | Cap de la Hague <sup>5</sup><br>(NRP) | Sellafield <sup>5</sup><br>(NRP) | Mayak <sup>5</sup><br>(PPP) | Stepovogo Fjord <sup>5</sup><br>(Sunken submarine reactor) | Abrosimov Fjord <sup>5</sup><br>(Sunken submarine reactor) |
|------------------------------------------|--------------------------------------------|---------------------------------|---------------------------------|--------------------------------------|---------------------------------------|----------------------------------|-----------------------------|------------------------------------------------------------|------------------------------------------------------------|
| <sup>238</sup> Pu/ <sup>239+240</sup> Pu | 0.028 <sup>a</sup>                         | 0.38 <sup>a</sup>               | 1.2 <sup>b</sup>                | 0.0161 ± 0.0005 <sup>c</sup>         | 0.36 <sup>d</sup>                     | 0.19 <sup>d</sup>                | 0.005–0.018 <sup>d</sup>    | 0.12 <sup>d</sup>                                          | 0.45 <sup>d</sup>                                          |
| <sup>241</sup> Am/ <sup>239+240</sup> Pu | 0.38 <sup>a</sup>                          | 2.0 <sup>a</sup>                | -                               | 0.169 ± 0.005 <sup>c</sup>           | -                                     | -                                | -                           | -                                                          | -                                                          |

<sup>1</sup>(UNSCEAR, 2000)

<sup>2</sup>(Salminen et al., 2005)

<sup>3</sup>(Hirose and Povinec, 2015)

<sup>4</sup>(Eriksson et al., 2008)

<sup>5</sup>(Oughton et al., 2001)

<sup>a</sup>decay corrected to 2013

<sup>b</sup>decay corrected to 2011

<sup>c</sup>decay corrected to 2001

<sup>d</sup>reference date specified elsewhere (Oughton et al., 2001)

Eriksson, M., Lindahl, P., Roos, P., Dahlgard, H., and Holm, E.: U, Pu, and Am nuclear signatures of the Thule hydrogen bomb debris, *Environ Sci Technol*, 42, 4717–4722, <https://doi.org/10.1021/es800203f>, 2008.

Hirose, K. and Povinec, P. P.: Sources of plutonium in the atmosphere and stratosphere-troposphere mixing, *Sci Rep*, 5, 1–9, <https://doi.org/10.1038/srep15707>, 2015.

Oughton, D., Day, P., and Fifield, K.: Plutonium measurement using accelerator mass spectrometry: Methodology and applications, *Radioactivity in the Environment*, 1, 47–62, [https://doi.org/10.1016/S1569-4860\(01\)80006-1](https://doi.org/10.1016/S1569-4860(01)80006-1), 2001.

Salminen, S., Paatero, J., Jaakkola, T., and Lehto, J.: Americium and curium deposition in Finland from the Chernobyl accident, *Radiochim. Acta*, 93, 771–779, 2005.

UNSCEAR: ANNEX C: Exposures to the Public from Man-Made Sources of Radiation. Report of the United Nations Scientific Committee on the Effects of Atomic Radiation., 2000.

**Table S7: Activity ratios of  $^{238}\text{Pu}/^{239+240}\text{Pu}$  and  $^{241}\text{Am}/^{239+240}\text{Pu}$  in quarters.**

| year      | quarter | $^{238}\text{Pu}/^{239+240}\text{Pu}$ | $^{241}\text{Am}/^{239+240}\text{Pu}$ |
|-----------|---------|---------------------------------------|---------------------------------------|
| 2007      | 1       | 0.70 ± 0.12                           | 17.1 ± 2.0                            |
| 2007      | 2       | 0.068 ± 0.068                         | 67.8 ± 6.7                            |
| 2007      | 3       | 0.271 ± 0.074                         | 14.2 ± 1.6                            |
| 2007      | 4       | 0.231 ± 0.056                         | 16.1 ± 2.0                            |
| 2008      | 1       | 0.042 ± 0.042                         | 25.0 ± 2.4                            |
| 2008      | 2       | 0.126 ± 0.032                         | 14.3 ± 1.3                            |
| 2008      | 3       | 0.11 ± 0.11                           | 17.9 ± 2.1                            |
| 2008      | 4       | 0.191 ± 0.031                         | 5.0 ± 0.4                             |
| 2009      | 1       | 0.39 ± 0.41                           | 28.0 ± 8.5                            |
| 2009      | 2       | 0.537 ± 0.098                         | 136 ± 13                              |
| 2009      | 3       | 0.966 ± 0.066                         | 6.48 ± 0.50                           |
| 2009      | 4       | 1.30 ± 0.15                           | 33.8 ± 3.3                            |
| 2010      | 1       | 0.334 ± 0.046                         | 36.4 ± 2.8                            |
| 2010      | 2       | 0.413 ± 0.056                         | 16.6 ± 1.2                            |
| 2010      | 3       | 0.104 ± 0.059                         | 51.1 ± 3.9                            |
| 2010      | 4       | 0.0507 ± 0.0078                       | -                                     |
| 2011/2012 | 1-4     | 0.86 ± 0.20                           | 13.7 ± 2.0                            |
| 2013      | 1, 2    | 1.99 ± 0.25                           | 35.8 ± 3.9                            |
| 2013      | 2, 3    | 0.203 ± 0.066                         | 62.6 ± 7.7                            |
| 2014      | 1       | 0.33 ± 0.34                           | 74 ± 16                               |
| 2014      | 2       | 0.064 ± 0.065                         | 45.5 ± 5.2                            |
| 2014      | 3       | 0.124 ± 0.037                         | 15.6 ± 1.3                            |
| 2014      | 4       | 0.181 ± 0.042                         | 6.03 ± 0.72                           |
| 2015      | 1       | 0.037 ± 0.037                         | 13.4 ± 1.1                            |
| 2015      | 2       | 0.10 ± 0.10                           | 35.0 ± 3.9                            |
| 2015      | 3       | 0.426 ± 0.017                         | 2.46 ± 0.12                           |
| 2015      | 4       | 0.021 ± 0.021                         | 54.1 ± 4.0                            |
| 2016      | 1       | 0.075 ± 0.028                         | 141 ± 10                              |
| 2016      | 2       | 0.157 ± 0.033                         | 138 ± 10                              |
| 2016      | 3       | 0.10 ± 0.10                           | 39.2 ± 4.2                            |
| 2016      | 4       | 0.165 ± 0.044                         | 8.75 ± 0.92                           |
| 2017      | 1       | 0.19 ± 0.20                           | 47.5 ± 7.6                            |

|             |   |                 |               |
|-------------|---|-----------------|---------------|
| <b>2017</b> | 2 | 0.286 ± 0.089   | 39.6 ± 3.7    |
| <b>2017</b> | 3 | 6.29 ± 0.68     | 12.9 ± 1.5    |
| <b>2017</b> | 4 | 1.62 ± 0.12     | 9.23 ± 0.69   |
| <b>2018</b> | 1 | 3.41 ± 0.52     | 42.2 ± 5.9    |
| <b>2018</b> | 2 | 2.14 ± 0.34     | 105 ± 14      |
| <b>2018</b> | 3 | 0.173 ± 0.029   | 52.5 ± 3.4    |
| <b>2018</b> | 4 | 3.79 ± 0.30     | -             |
| <b>2019</b> | 1 | 8.29 ± 0.55     | 459 ± 30      |
| <b>2019</b> | 2 | 0.434 ± 0.075   | 79.0 ± 6.3    |
| <b>2019</b> | 3 | 0.063 ± 0.063   | 32.7 ± 2.4    |
| <b>2019</b> | 4 | 0.133 ± 0.019   | 7.62 ± 0.41   |
| <b>2020</b> | 1 | 0.0766 ± 0.0067 | 1.539 ± 0.078 |
| <b>2020</b> | 2 | 0.406 ± 0.050   | 16.4 ± 1.3    |
| <b>2020</b> | 3 | 2.68 ± 0.21     | 11.60 ± 0.90  |
| <b>2020</b> | 4 | 0.149 ± 0.023   | 12.61 ± 0.80  |
| <b>2021</b> | 1 | 0.380 ± 0.074   | 5.86 ± 0.65   |
| <b>2021</b> | 2 | 0.213 ± 0.044   | 19.7 ± 1.8    |
| <b>2021</b> | 3 | 0.39 ± 0.10     | 13.3 ± 2.0    |
| <b>2021</b> | 4 | 0.115 ± 0.016   | 3.72 ± 0.29   |

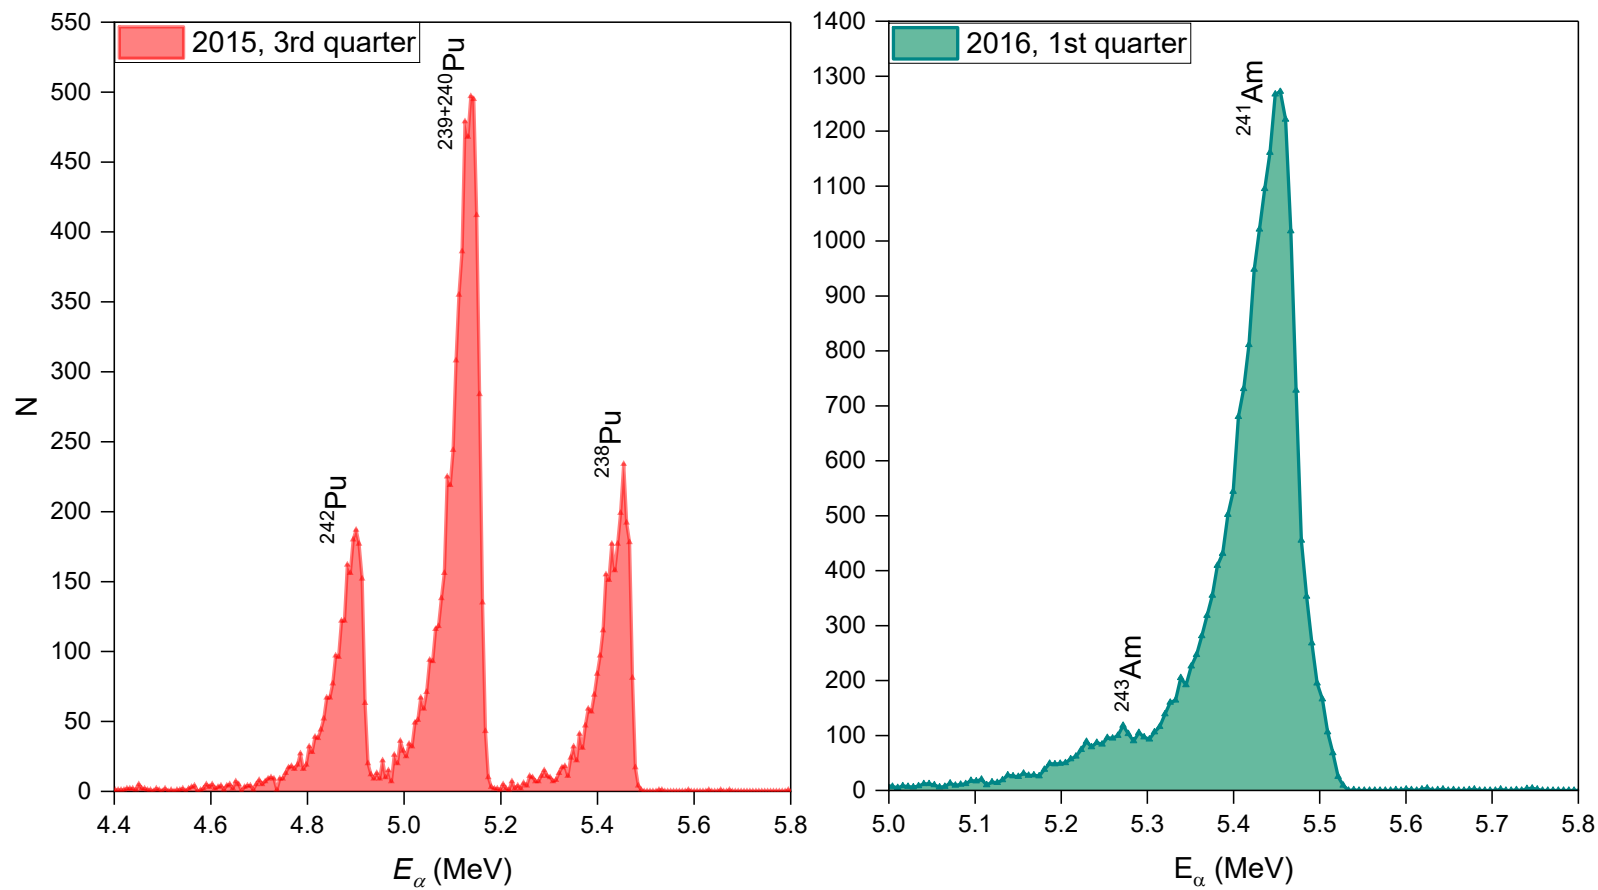

**Figure S1: Alpha spectra of Pu and Am isotopes for air filter samples collected in the 3rd quarter of 2015 and 1st quarter of 2016, respectively. The acquisition time was two weeks for Pu and one week for Am.**

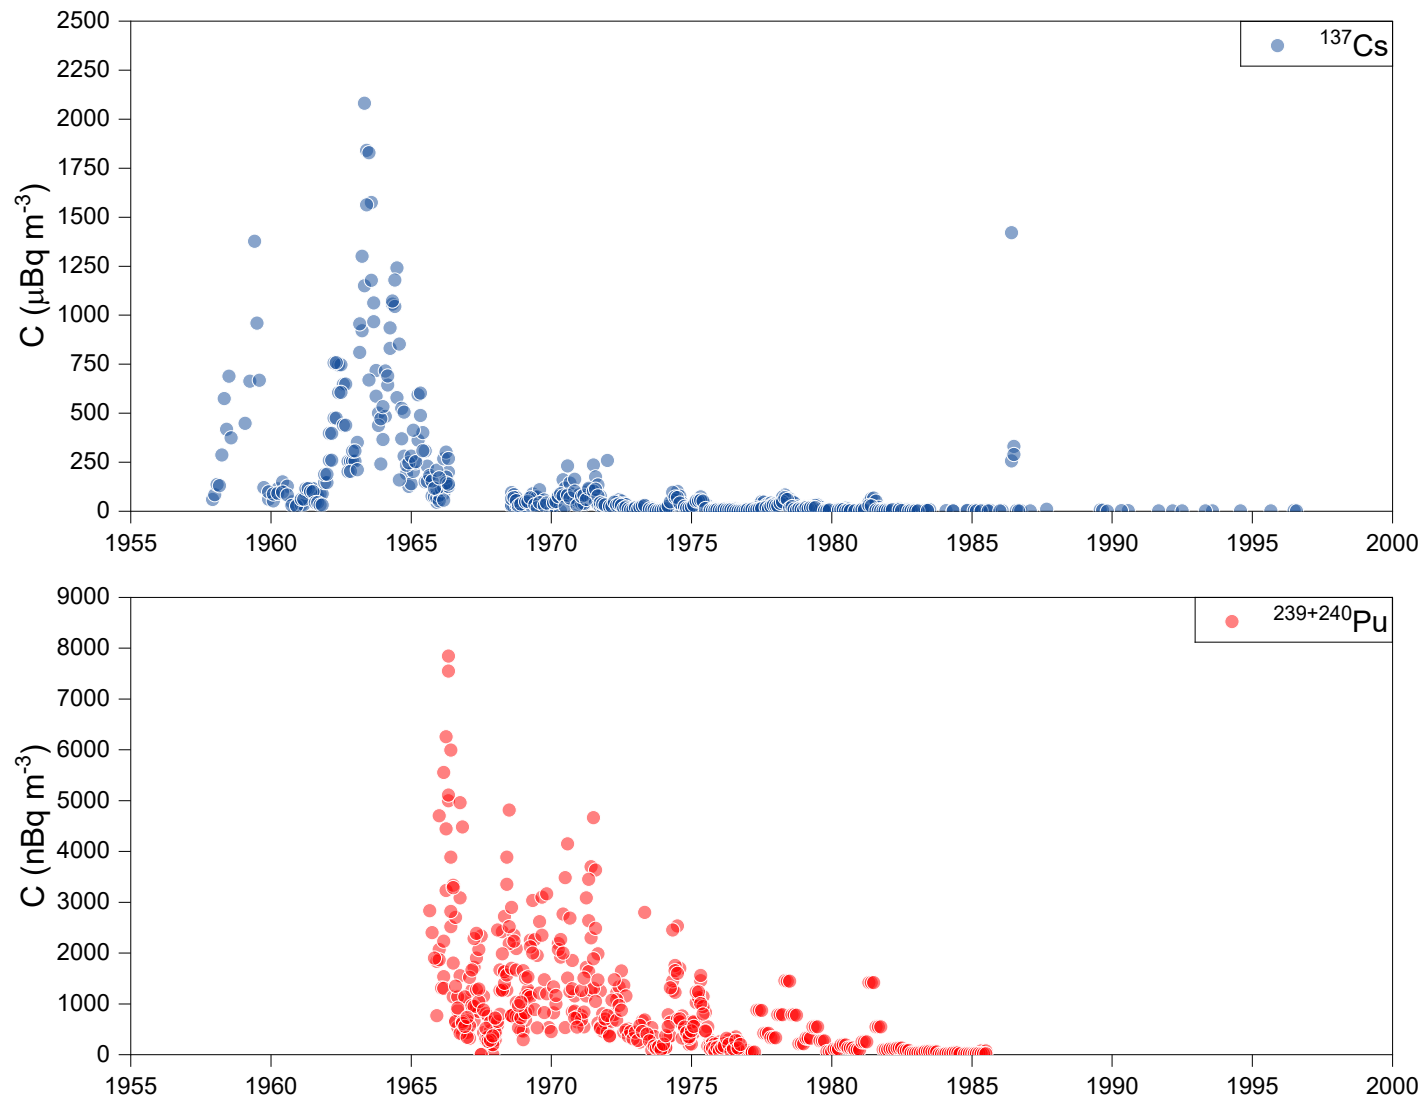

**Figure S2: Time series of  $^{137}\text{Cs}$  and  $^{239+240}\text{Pu}$  activity concentrations in surface air for sites north of  $50^\circ\text{N}$ . Data collected by EML within the Surface Air Sampling Program (SASP) in the years 1963–1999 (and NRL during the 1957–1962 period).**

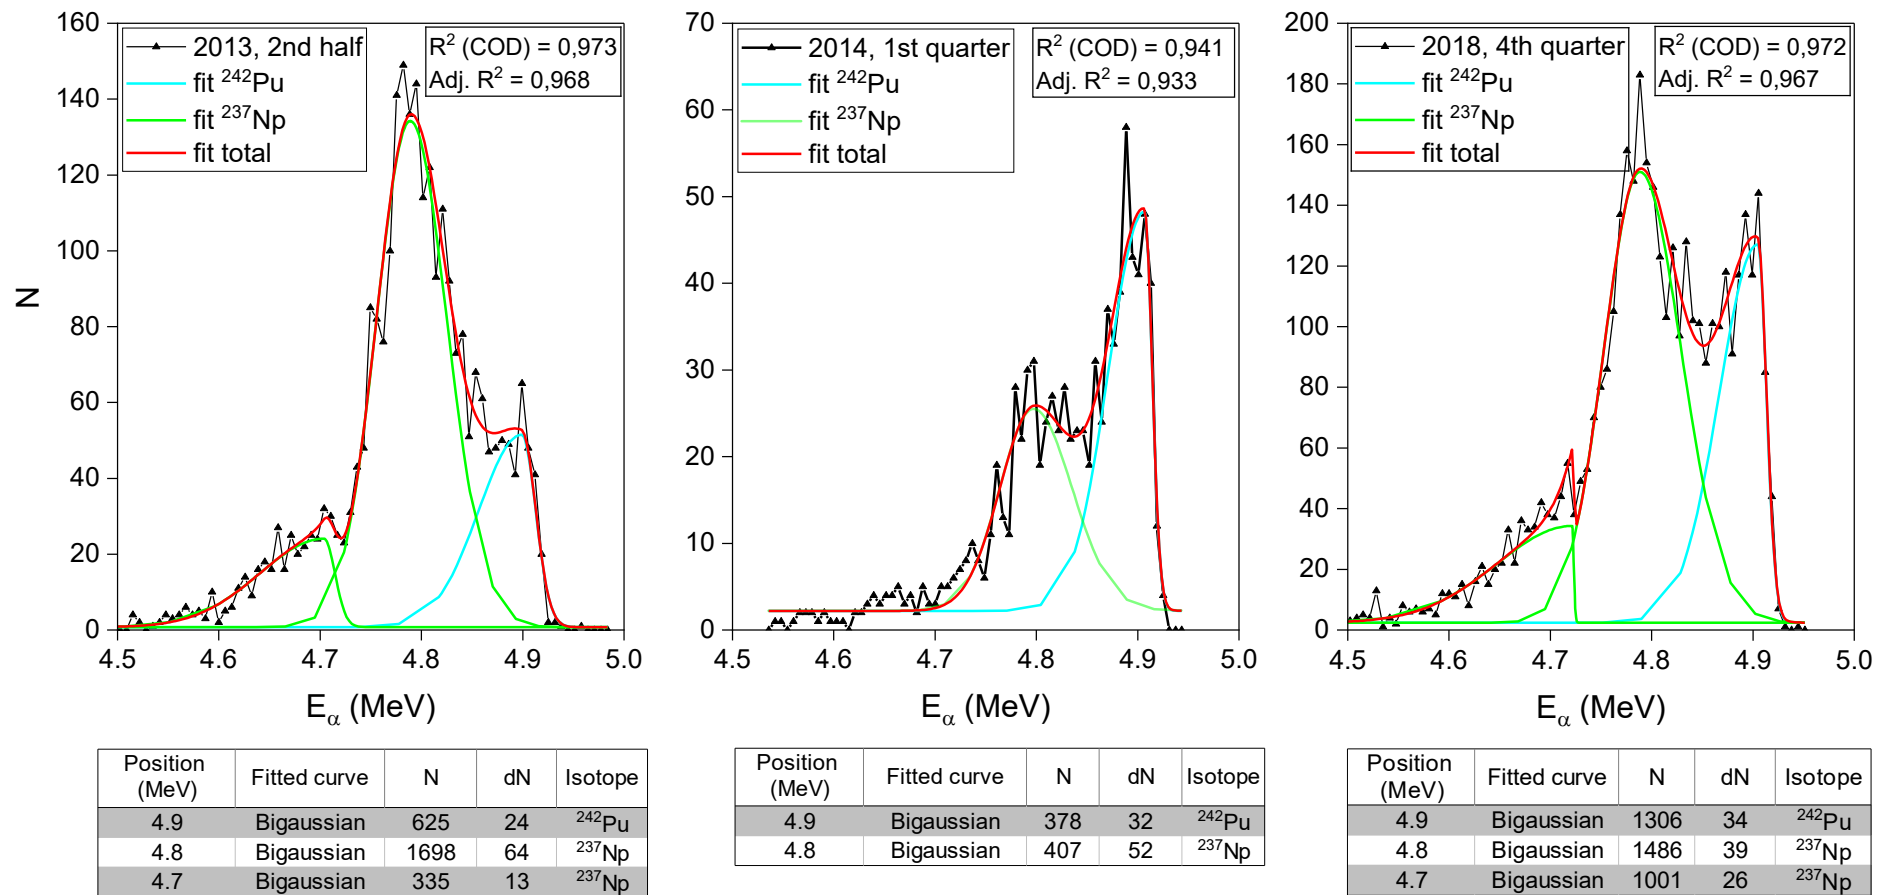

Figure S3: Bigaussian fitting procedure to resolve overlapping  $^{242}\text{Pu}$  and  $^{237}\text{Np}$  peaks with count integration for each spectral line.

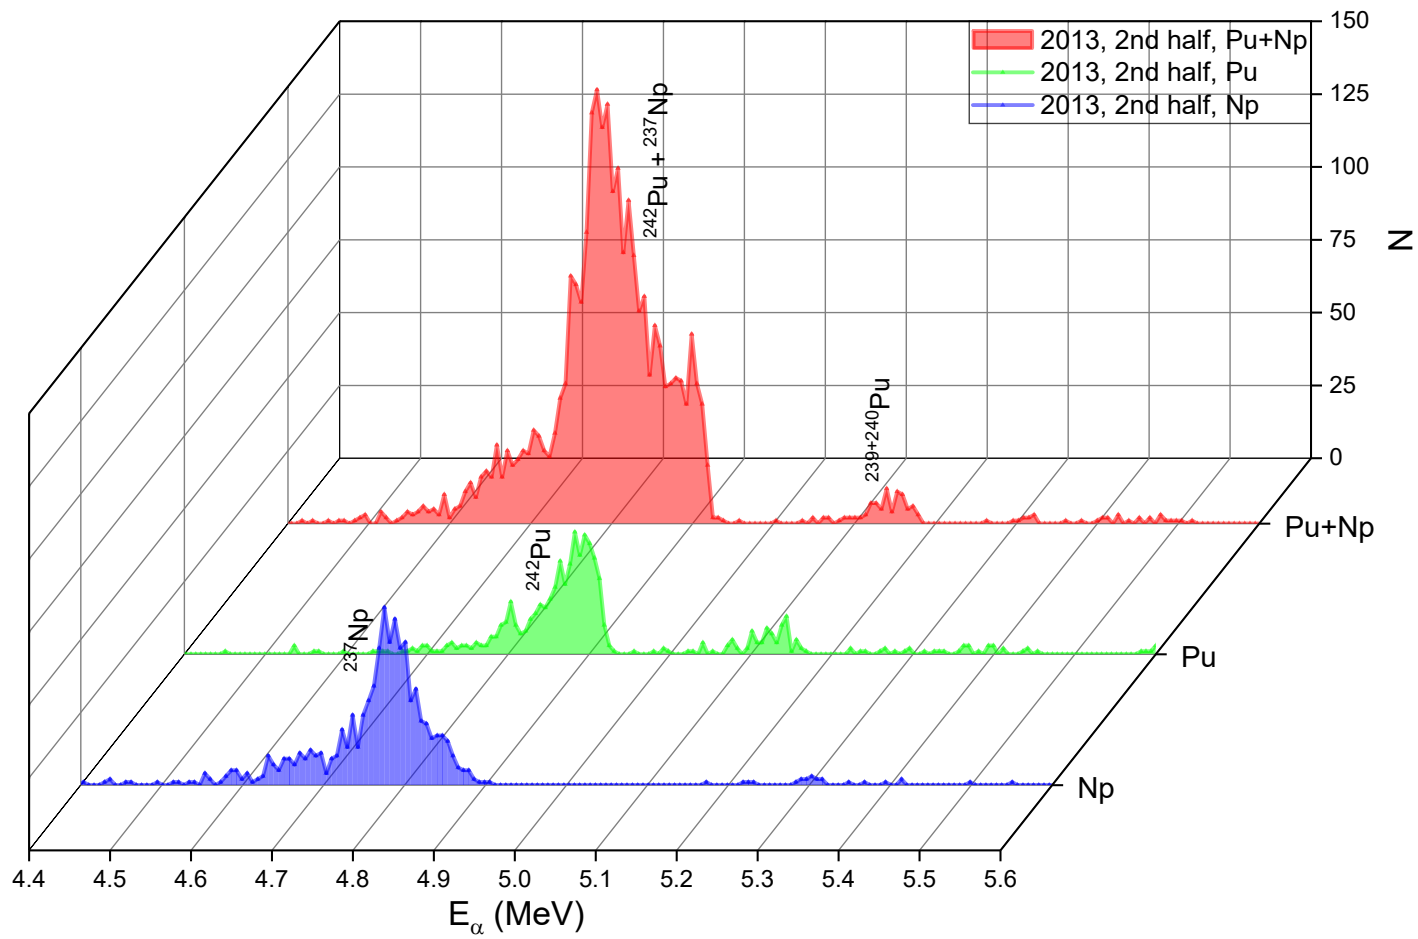

**Figure S4: Alpha spectra of Pu+Np isotopes prior to separation, along with Pu isotopes and  $^{237}\text{Np}$  after separation, from an air filter sample collected in the second half of 2013. The acquisition time was one week.**
